# Supplementary material for: Assessment of phylo-functional coherence along the bacterial phylogeny and taxonomy
Source: PubMed Central journal article supplement (PMC8050241; doi:10.1038/s41598-021-87909-1), 2021-04-15

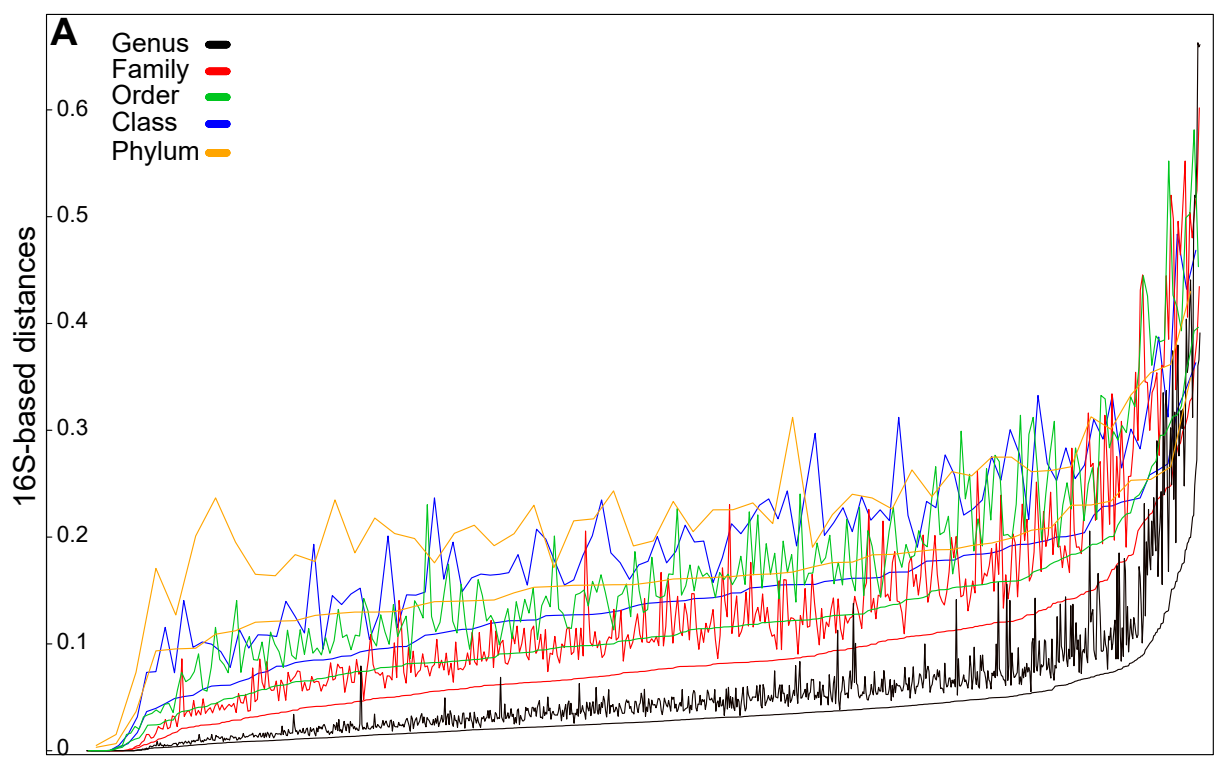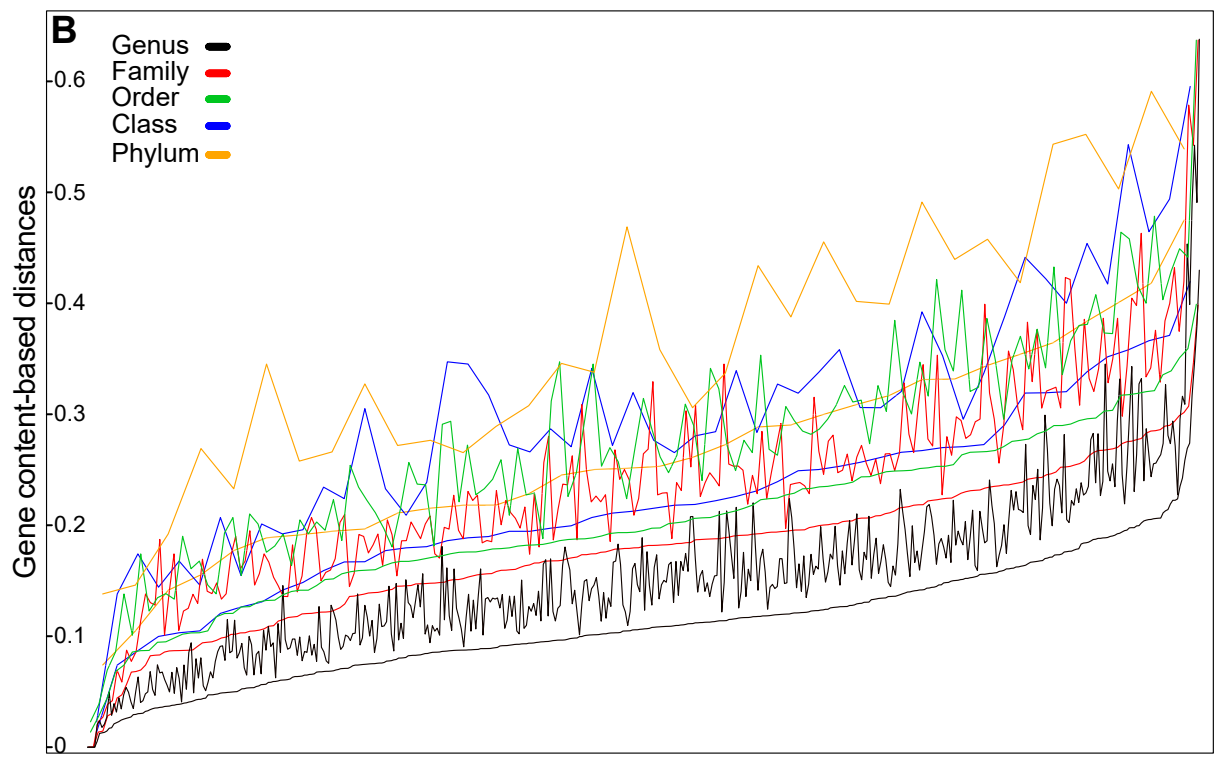

Supplement: 41598_2021_87909_MOESM4_ESM.pdf [file 41598_2021_87909_MOESM4_ESM.pdf]
